## Research Article

# ECMO attenuates inflammation response and increases ATPase activity in brain of swine model with cardiac arrest compared with CCPR

Yun Zhang<sup>1,2</sup>,  Chun-Sheng Li<sup>2</sup>, Xiao-Li Yuan<sup>1,2</sup>, Ji-Yang Ling<sup>1,2</sup>, Qiang Zhang<sup>2</sup>, Yong Liang<sup>2</sup>, Bo Liu<sup>2</sup> and Lian-Xing Zhao<sup>2</sup>

<sup>1</sup>Department of Emergency Medicine, Beijing Tongren Hospital, Capital Medical University, Beijing, China; <sup>2</sup>Department of Emergency Medicine, Beijing Chaoyang Hospital, Capital Medical University, Beijing, China

**Correspondence:** Chun-Sheng Li (lcscyy@163.com or drlcscyy@sina.com)

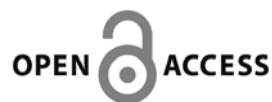

Extracorporeal membrane oxygenation (ECMO) could increase survival rate and neurological outcomes of cardiac arrest (CA) patients compared with conventional cardiopulmonary resuscitation (CCPR). Currently, the underlying mechanisms how ECMO improves neurological outcomes of CA patients compared with CCPR have not been revealed. A pig model of CA was established by ventricular fibrillation induction and then underwent CCPR or ECMO. Survival and hemodynamics during the 6 h after return of spontaneous circulation (ROSC) were compared. The levels of inflammatory cytokines and Ca<sup>2+</sup>-ATPase and Na<sup>+</sup>-K<sup>+</sup>-ATPase activities were detected. Brain tissues histology and ultra-microstructure in CCPR and ECMO groups were also examined. Results suggested that ECMO significantly improved the survival of pigs compared with CCPR. Heart rate (HR) decreased while cardiac output (CO) increased along with the time after ROSC in both ECMO and CCPR groups. At each time point, HR in ECMO groups was lower than that in CCPR group while CO and mean arterial pressure in ECMO group was higher than CCPR group. In ECMO group, lower levels of IL-1, IL-1 $\beta$ , IL-6, TNF $\alpha$ , and TGF $\beta$ , especially IL-1, IL-6, TNF $\alpha$ , and TGF $\beta$ , were found compared that in CCPR group while no difference of IL-10 between the two groups was observed. Similar with the results from enzyme-linked immunosorbent assay, decreased expressions of IL-6 and TGF $\beta$  were also identified by Western blotting. And Ca<sup>2+</sup>-ATPase and Na<sup>+</sup>-K<sup>+</sup>-ATPase activities were increased by ECMO compared with CCPR. Hematoxylin and eosin staining and ultra-microstructure examination also revealed an improved inflammation situation in ECMO group compared with CCPR group.

## Introduction

Cardiac arrest (CA), with very poor survival and neurological outcome, is the leading cause of sudden death and accounts for appropriate half of all cardiac deaths [1–5]. In past decades, extracorporeal membrane oxygenation (ECMO), also called extracorporeal life support (ECLS), has been used as an alternative resuscitative method for patients with refractory CA in the emergency department, intensive care unit, or catheterization room [6,7]. A series of recent studies suggested that, compared with conventional cardiopulmonary resuscitation (CCPR), extracorporeal cardiopulmonary resuscitation (ECPR) with ECMO strategies may improve survival and neurological outcomes in both out of hospital CA (OHCA) and in of hospital CA (IHCA), especially in IHCA [8–12]. Survival to discharge rates of ECPR have been reported to be 4–36% for adult OHCA and 34–46% for adult IHCA [13,14], while survival to discharge rates following CCPR have been estimated at 10–20% for CA [5,15–17]. A recent meta-analysis

Received: 26 December 2018  
Revised: 21 May 2019  
Accepted: 11 June 2019

Accepted Manuscript online:  
28 June 2019  
Version of Record published:  
19 July 2019

suggested that the use of ECMO is associated with an absolute increase of 30-day survival of 13% compared with patients not receiving ECMO and a higher rate of favorable neurological outcome at 30-days [18].

Unfortunately, the underlying mechanisms that ECMO is associated with more favorable neurological outcomes compared with CCPR in CA patients are not clear. Animal experiments suggest that inflammatory cytokines expressions such as IL-1 $\beta$ , IL-6, IL-8, IL-10, and TNF $\alpha$  are aberrantly expressed in blood as well as in tissues after CA and cardiopulmonary resuscitation (CPR) [19]. TNF $\alpha$ , IL-1 $\beta$ , and IL-6 up-regulation in brain can lead to nerve cell apoptosis and necrosis [20], glial cells, neurons, axonal injury, and brain tissue edema [21], neurotransmitter transporter obstacles [22], the destruction of the blood–brain barrier (BBB) [23] and increased oxidative stress injury of the brain tissue [24,25], while IL-10 has a significant protective effects on brain injury [26]. Thus, we hypothesized that ECMO exerts protective effects on brain via attenuating inflammation in brain and then contributes to a high survival rate and favorable neurological outcomes. However, currently, the brain inflammation in CA after ECMO and CCPR has not been investigated.

In the present study, we established a pig model of CA and then compared the inflammatory cytokines levels in brain tissues after CCPR or ECMO treatment. In addition, the ATPase activities were also compared.

## Materials and methods

### Animals and experimental protocol

The present study was conducted in accordance with the guideline for the Animal Care and Use, established by the Beijing Chaoyang Hospital of the Capital Medical University, and all experimental protocols were approved by the Ethics Committee of Animal Experiments of Capital Medical University.

Sixteen Chinese landrace pigs ( $27.0 \pm 2.5$  kg; 12–14 weeks) were fasted overnight with free access to water. Then, the pigs were pre-anesthetized with 0.5 mg/kg midazolam intra-muscular injection and 1.0 mg/kg continuous infusion in ear vein. Next, the pigs were placed securely on the anesthesia table and their sedation was maintained with an intravenous infusion of pentobarbital (8 mg/kg/h). After that, endotracheal intubation into trachea and conventional mechanical ventilation with a volume-controlled ventilator (Drager vi 400, Munich, Germany) were performed. The following parameters were monitored: tidal volume, 15 ml/kg; fraction of inspired oxygen (FiO<sub>2</sub>), 0.21; and respiratory frequency, 12 breaths/min. The end-tidal partial pressure of carbon dioxide (PCO<sub>2</sub>) was measured by an inline infrared capnography (CO2SMO plus monitor; Respirometric Inc, Murrysville, PA). Room temperature was maintained at 26°C and core temperature of the animals was maintained at  $37.5 \pm 0.5$ °C. And then, they were instrumented with a carotid output flow probe (PS-Series Probes, Transonic, NY), two fluid-filled catheters into the left carotid artery and right atrium, and a hand-made pneumatic occluder around the proximal left descending coronary artery. Two cannulae were also inserted into the right femoral vessels, one arterial (15F) and one venous (19F; HLS; Maquet, Rastatt, Germany) for further implementation of ECPR. During the experiments, carotid blood flow, arterial blood pressure, and electrocardiogram (ECG) were continuously recorded. Arterial blood samples were collected at baseline every 60 min after CCPR or ECMO initiation.

The experimental protocols were as follows: after instrumentation, the pigs were equilibrated for 30 min to achieve stabilization. Next ventricular fibrillation was induced by programmed electric stimulation (30 V) and confirmed by the VF wave in the ECG. Then conventional CPR was performed in all pigs by continuous external chest compressions using an automated device (100 compressions/min, Shanghai Henlong Science and Education Equipment LTD) and asynchronous ventilation. The compression-to-ventilation ratio was 30:2. After 10 min of conventional CPR, the pigs were randomly divided into CCPR group ( $n=8$ ) and ECMO group ( $n=8$ ). The pigs of CCPR group continued to receive CCPR for 360 min, while the pigs of ECMO group were shifted to VA-ECMO for 360 min using a transportable device (Cardiohelp; Maquet). Accordingly, circuit and membrane oxygenator (HLS; Maquet) were primed and heparinized (5000 IU). Extracorporeal blood flow was progressively increased to 50–60 ml/kg/min to optimize the blood flow of the animals in order to make them to achieve a highest mean arterial pressure (MAP). The research endpoints were death of the animals or 6 h after return of spontaneous circulation (ROSC). The ROSC was defined as MAP was beyond 60 mmHg for 20 min or a systolic blood pressure was over 80 mmHg. CPR in CCPR groups was stopped after ROSC. When ROSC was achieved, the time was set to 0 h. Blood samples were collected for laboratory testing at 0, 1, 2, 4, and 6 h after ROSC (ROSC 0 h, ROSC 1 h, ROSC 2 h, ROSC 4 h, and ROSC 6 h, respectively) or until the animals died. At the end of the research, the surviving animals were killed and the frontal cortex samples of the left hemisphere of brain, which were closely related to the functional outcomes, were rapidly harvested, snap-frozen in liquid nitrogen immediately, and subsequently stored at  $-80$ °C for further study.

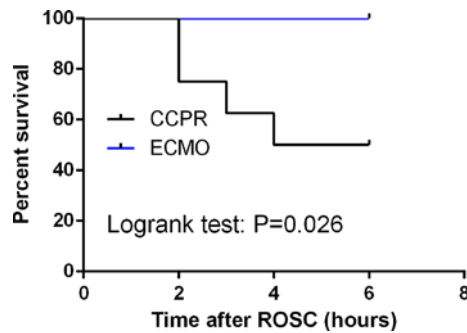

**Figure 1. Comparison of survival rate and rescue time for ROSC in CA swine undergoing EPCR ( $n=8$ ) or CCPR ( $n=8$ )**  
CCPR, conventional cardiopulmonary resuscitation; ECMO, extracorporeal membrane oxygenation; EPCR, extracorporeal cardiopulmonary resuscitation with ECMO strategies; ROSC, return of spontaneous circulation.

### Hemodynamics

Hemodynamic parameters, including heart rate (HR), MAP, and cardiac output (CO), were monitored. HR was recorded by the standard lead II ECG. MAP was measured with a fluid-filled catheter advanced from the left femoral artery into the aortic arch through a pressure transducer with pulse indicator continuous COCO system. A Swan–Ganz catheter (7 Fr; Edwards Life Sciences, Irvine, CA, U.S.A.) was advanced from the left femoral vein and flow directed into the pulmonary artery to measure CO by the thermodilution method. All the values were recorded at baseline, at ROSC 0 h (ROSC0), and at 1 h (ROSC1), 2 h (ROSC2), 4 h (ROSC4), and 6 h (ROSC6) after ROSC.

### Detection of IL-1, IL-1 $\beta$ , IL-6, IL-10, TNF $\alpha$ , TGF $\beta$ , and KL-6 levels in brain

Frozen cerebral cortex samples were firstly homogenized in cold-PBS supplied with protease inhibitors (Sigma–Aldrich, St Louis, MO, U.S.A.). The sample weight to PBS ratio was 1 g: 9 ml. To further break the cells, the samples were sonicated with an ultrasonic cell disrupter. Then the homogenates were centrifuged for 5 min at  $5000 \times g$  to get the supernatants. The concentration of the total proteins was determined by the Bradford method. The levels of IL-1, IL-1 $\beta$ , IL-6, IL-10, TNF $\alpha$ , TGF $\beta$ , and KL-6 were detected via an enzyme-linked immunosorbent assay (ELISA) according to the manufacturer's instructions (Shanghai Renjie Biotech LTD). Each sample was detected in triplicate. The proteins expression levels of IL-1 $\beta$ , IL-6 (Abcam, U.S.A.), IL-10 (Sangon, Shanghai, China), and TGF $\beta$  (R&D Systems, U.S.A.) were also examined by Western blotting with corresponding primary antibodies and secondary antibodies. The optical densities of the immunoreactive bands were assessed using Image J software. The protein levels were normalized to Tubulin and expressed as ratios.

### Ca<sup>2+</sup>-ATPase and Na<sup>+</sup>-K<sup>+</sup>-ATPase activity detection

Ca<sup>2+</sup>-ATPase and Na<sup>+</sup>-K<sup>+</sup>-ATPase activities were measured as ATP cleavage in a medium containing (mmol/l) 130 NaCl, 20 KCl, 3 MgCl<sub>2</sub>, 3 ATP, and 30 imidazole, pH 7.4, at 37°C. Inorganic phosphate concentration was determined with colorimetric assays according to the manufacturer's instructions.

### Histology and ultramicrostructure examination

Brain tissues were fixed with 10% formalin, dehydrated and embedded in paraffin, cut into section, stained with hematoxylin and eosin, and observed by an optical microscopy (CX41; Olympus, Tokyo, Japan). For ultra-microstructure examination, brain tissues were cut into pieces (1.0 mm  $\times$  1.0 mm  $\times$  1.0 mm), treated with 3% glutaraldehyde, flushed with phosphate-buffered saline, fixed with 1% perosmic acid, and dehydrated with acetone. Ultrathin sections were placed on 200-mesh copper grids and double stained with 4% uranyl acetate and 0.2% lead citrate. Sections were examined under transmission electron microscopy (H-7650; Hitachi, Ibaraki, Japan).

### Statistical analysis

Data were expressed as mean  $\pm$  standard deviation (SD) for continuous variables. Survival after ROSC of the animals between CCPR and ECMO groups were compared with Kaplan–Meier plot curves and Log–Rank test. Hemodynamic parameters between CCPR and ECMO groups were compared with two-way ANOVA and Sidak's multiple comparisons test. The difference of the other variables between CCPR and ECMO groups was compared by unpaired Student *t* test. Nonparametric data was expressed as median (interquartile range) and analyzed by the Mann–Whitney U test.

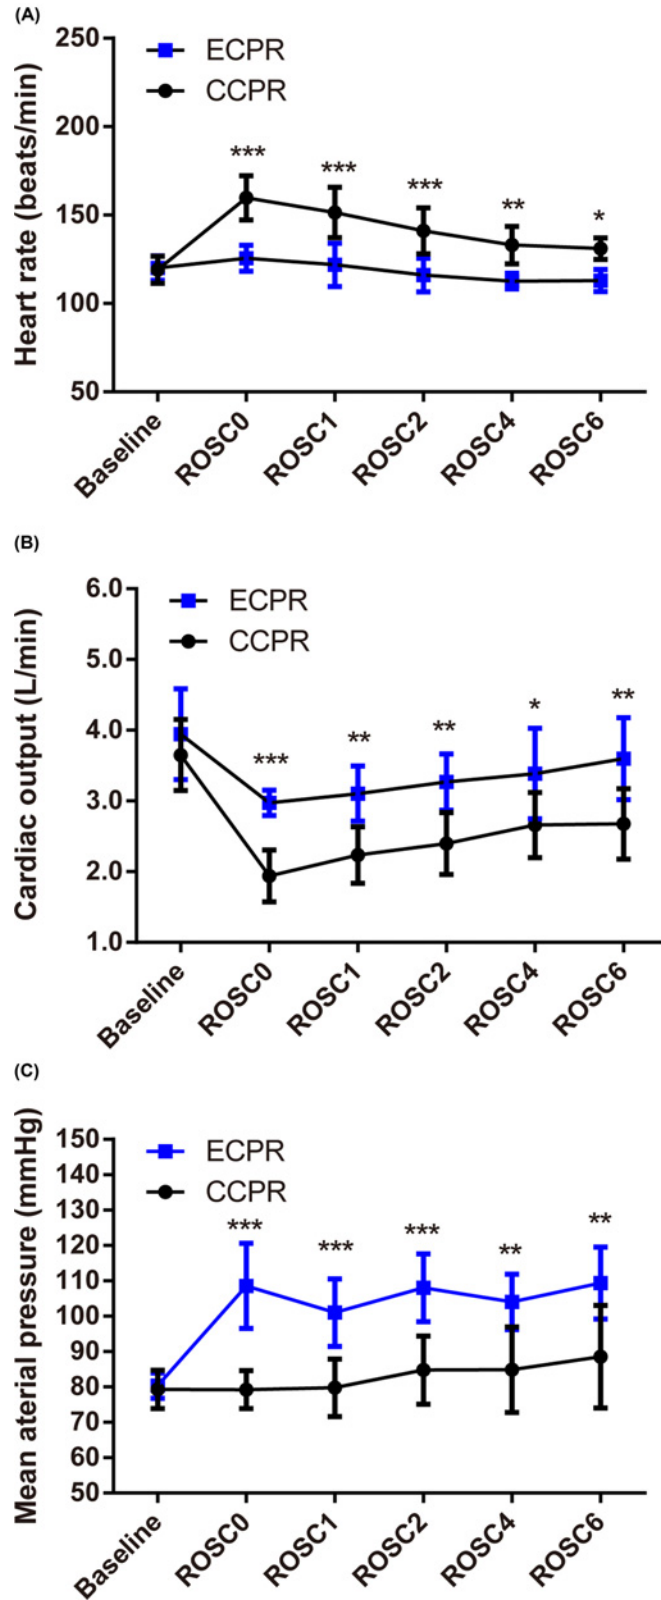

**Figure 2.** Comparison of hemodynamics in CA swine undergoing ECMO (n=8) or CCPR (n=8)

(A) HR; (B) CO; (C) MAP. \* $P < 0.05$ ; \*\* $P < 0.01$ ; \*\*\* $P < 0.001$ ; CCPR, conventional cardiopulmonary resuscitation; ECMO, extracorporeal membrane oxygenation; ECPR, extracorporeal cardiopulmonary resuscitation with ECMO strategies; ROSC, return of spontaneous circulation.

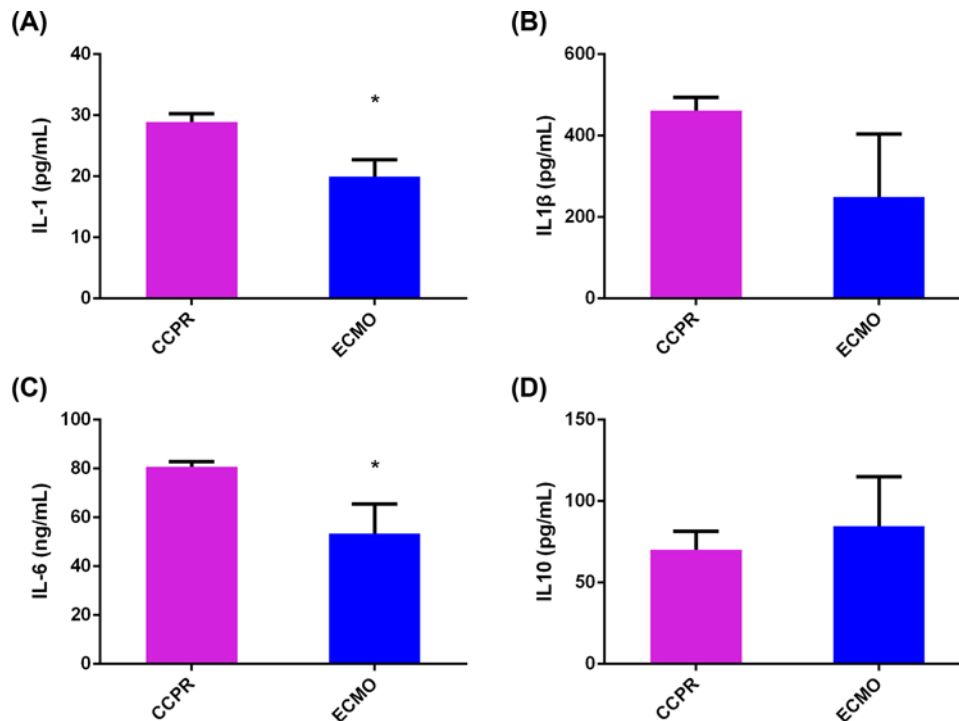

**Figure 3. ELISA detection of IL-1, IL-1 $\beta$ , IL-6, and IL-10 in brain tissues of pigs with ventricular fibrillation undergoing EPCR (n=8) or CCPR (n=4)**

(A) IL-1, (B) IL-1 $\beta$ , (C) IL-6, and (D) IL-10. \* $P < 0.05$ ; CCPR: Conventional cardiopulmonary resuscitation; ECMO: Extracorporeal membrane oxygenation; EPCR: Extracorporeal cardiopulmonary resuscitation with ECMO strategies; ROSC: Return of spontaneous circulation.

All statistical analysis was performed with GraphPad Prism 6.0 software (GraphPad Software, Inc. CA, U.S.A.). A two-tailed  $P < 0.05$  was considered as statistical significance.

## Results

### Survival

All the animals in both ECMO and CCPR groups achieved ROSC. During 6 h-follow up after ROSC, the following 6 h observation after ROSC, 100% (8/8) swine survived in ECMO groups while 50% (4/8) swine survived in CCPR group (Figure 1).

### Hemodynamics

HR, CO, and MAP at baseline between ECMO group and CCPR group were comparable. HR decreased while CO increased along with the time after ROSC in both ECMO and CCPR groups (Figure 2A,B). At each time point, HR in ECMO groups was lower than that in CCPR group, while CO in ECMO group was higher than CCPR group (Figure 2A,B). In addition, MAP was higher in ECMO group compared with CCPR group (Figure 2C).

### Inflammation in pig brain was relieved by ECMO after ventricular fibrillation

The cerebral cortex samples of the pigs were homogenized and sonicated, and the inflammation cytokines in the samples were determined by ELISA. In ECMO group, the levels of IL-1, IL-1 $\beta$ , IL-6, TNF $\alpha$ , and TGF $\beta$  (especially IL-1, IL-6, TNF $\alpha$ , and TGF $\beta$ ) were lower compared with CCPR group (Figures 3A–C and 4A,B), while no difference of IL-10 levels between the two groups was observed (Figure 3D). In addition, KL-6 was also examined and only a trend of decrease in ECMO group was identified (Figure 4C). Then the protein expression levels of IL-1 $\beta$ , IL-6, IL-10, and TGF $\beta$  were further validated by Western blotting. Similar with the results from ELISA, decreased of IL-6 and TGF $\beta$  in ECMO group were also identified (Figure 5).

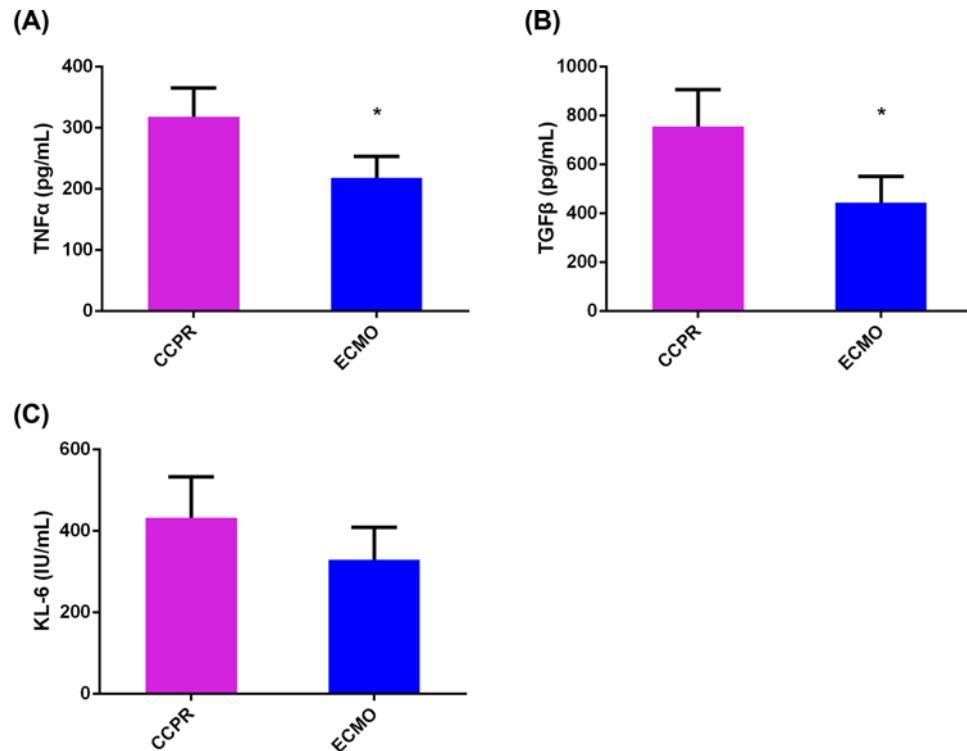

**Figure 4.** ELISA detection of TNF $\alpha$ , TGF $\beta$ , and KL-6 in brain tissues of pigs with ventricular fibrillation undergoing EPCR ( $n=8$ ) or CCPR ( $n=4$ ) (A) TNF $\alpha$ , (B) TGF $\beta$ , and (C) KL-6. \* $P < 0.05$ ; CCPR, conventional cardiopulmonary resuscitation; ECMO: Extracorporeal membrane oxygenation; EPCR, extracorporeal cardiopulmonary resuscitation with ECMO strategies; ROSC, return of spontaneous circulation.

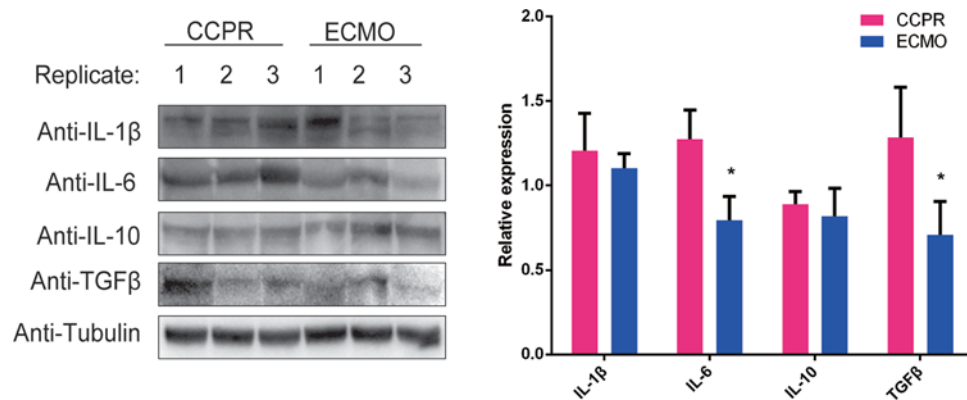

**Figure 5.** Western blotting analysis of IL-1 $\beta$ , IL-6, IL-10, and TGF $\beta$  in brain tissues of pigs with ventricular fibrillation undergoing EPCR ( $n=8$ ) or CCPR ( $n=4$ ) IL-1 $\beta$ , IL-6, IL-10 and TGF $\beta$ . \* $P < 0.05$ ; CCPR, conventional cardiopulmonary resuscitation; ECMO, extracorporeal membrane oxygenation; EPCR, extracorporeal cardiopulmonary resuscitation with ECMO strategies; ROSC, return of spontaneous circulation.

### ECMO increase ATPase activity in pig brain after ventricular fibrillation

ECMO might also relieve brain injury by enhancing aerobic metabolism. Thus the Ca<sup>2+</sup>-ATPase and Na<sup>+</sup>-K<sup>+</sup>-ATPase activities in ECMO and CCPR groups were also compared. The results suggested that ECMO increased both Ca<sup>2+</sup>-ATPase and Na<sup>+</sup>-K<sup>+</sup>-ATPase activities compared with CCPR in pig brain after ventricular fibrillation (Figure 6).

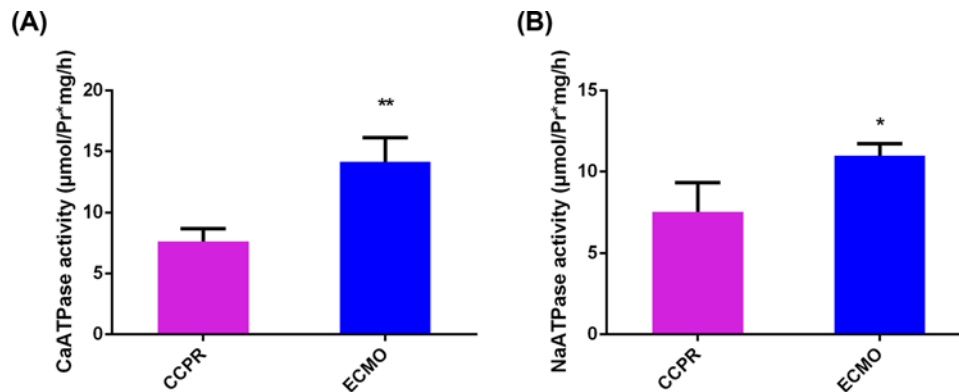

**Figure 6. Detection of Ca<sup>2+</sup>-ATPase and Na<sup>+</sup>-K<sup>+</sup>-ATPase activity in brain tissues of pigs with ventricular fibrillation undergoing EPCR (n=8) or CCPR (n=4)**

(A) Ca<sup>2+</sup>-ATPase and (B) Na<sup>+</sup>-K<sup>+</sup>-ATPase. \*P<0.05; \*\*P<0.01; CCPR, conventional cardiopulmonary resuscitation; ECMO, extracorporeal membrane oxygenation; EPCR, extracorporeal cardiopulmonary resuscitation with ECMO strategies; ROSC, return of spontaneous circulation.

## Brain histology and ultra-microstructure

Then brain tissues histology and ultra-microstructure in CCPR and ECMO groups were examined by hematoxylin and eosin staining and transmission electron microscope, respectively. In CCPR groups, the cells were found to present shrinkage, chromosome condensation, and nuclear pyknosis, and showed increased intercellular space and a large number of inflammatory cells were also found in CCPR group, while ECMO group showed an improved situation (Figure 7A). Under transmission electron microscope (TEM), the basement membranes were disrupted and mitochondria were swollen with disrupted cristae and phagocytic vacuole was increased in CCPR group, while the cells in ECMO groups had a relatively intact and clear structure (Figure 7B).

## Discussion

CA is a great health problem around the world [1,2]. ECMO, as an alternative resuscitative method, has been more increasingly and widely used for refractory CA and improves survival rate and neurological outcomes in both OHCA and IHCA compared with CCPR [18]. The neurological outcomes are critical contributors to the mortality of CA patients. The underlying mechanisms how ECMO improves neurological outcomes of CA patients are not clear. In the present study, we compared the inflammatory response and ATPase activity in brain in swine model of CA between ECMO and CCPR treatments and found that pro-inflammatory cytokines IL-1, IL-6, TNF $\alpha$ , and TGF $\beta$  levels and Ca<sup>2+</sup> - and Na<sup>+</sup>K<sup>+</sup>-ATPase activities were lower in ECMO group than CCRP group.

Many of the surviving CA patients develop severe neurological defect and other multi-organ dysfunction, also known as post-CA syndrome [27]. Evidence has shown that post-CA cerebral injury result in a death rate of 68% in OHCA and 23% in IHCA [28]. The underlying mechanism of post-resuscitation organ dysfunction may relate to inflammatory response in blood and tissues including brain [29]. Both animal experiments and clinical studies suggest that increased circulating pro-inflammatory cytokines such as IL-1 $\beta$ , IL-6, and TNF $\alpha$  in CA after successful CPR are associated with increased mortality [30–32]. Our previous *in vivo* studies also suggest that inhibition of TNF $\alpha$  levels by hypothermia contributes to the relief of neurological defect [33]. In the present study, we identified the significant decreased levels of IL-1, IL-6, and TNF $\alpha$  after ECMO compared with CCPR in CA swine but we did not observed the change of IL-10, a anti-inflammatory cytokine and protective factor during brain injury [26].

TGF $\beta$  is a super family of cytokines and plays a important role in cell growth, development, immunity, wound healing, inflammation, apoptosis, and cancer [34]. Currently, there are conflicting results about the effects of TGF $\beta$  in inflammation. A few reports suggested that TGF $\beta$  is a neuroprotective factor depending on the signaling pathways in different environmental conditions [35,36], however, more studies report that TGF $\beta$  can cause BBB disruption, hemorrhage, neuroinflammation, and cell death in various neurological diseases, indicating its role as excitotoxic and inflammatory factor [37–41]. Saghazadeh et al. [42] reveal that TGF $\beta$  can activate inflammatory cytokines expression including IL-1 $\beta$  and TNF $\alpha$  under several neurodegenerative conditions and Patel et al. [43] identify that traumatic brain injury-induced activation of TGF $\beta$  leads to neuroinflammation and neurodegeneration via phosphorylating Smad proteins in cultured rat cortical neurons. In our work, we observed the TGF $\beta$  was decreased in ECMO group

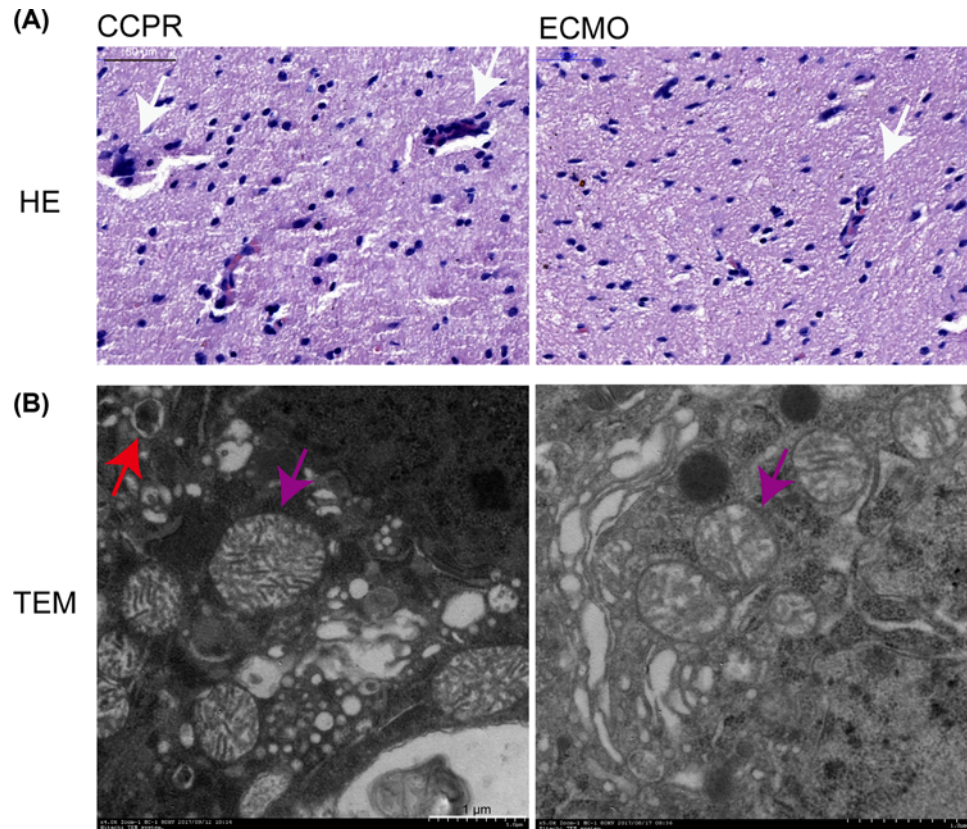

**Figure 7. Representative images of hematoxylin and eosin staining and ultrastructure examination of the kidney tissues CA swine undergoing EPCR ( $n=8$ ) or CCPR ( $n=4$ )**

(A) Hematoxylin and eosin staining. White arrow: infiltrated inflammatory cells. (B) Ultrastructure examination by TEM. Purple arrow: phagocytic vacuole; Red arrow: mitochondria. CCPR, conventional cardiopulmonary resuscitation; ECMO, extracorporeal membrane oxygenation; EPCR, extracorporeal cardiopulmonary resuscitation with ECMO strategies; ROSC, return of spontaneous circulation; TEM, transmission electron microscope.

compared with CCPR group. Combined with the IL-1 and TNF $\alpha$  results and the previous research, we hypothesized that TGF $\beta$  inhibition might attenuated brain injury partly via attenuating IL-1 and TNF $\alpha$ , which needed to be further validated in the future.

In our previous work, we observed that the increased activities of Ca<sup>2+</sup>-ATPase and Na<sup>+</sup>-K<sup>+</sup>-ATPase activities induced by drug treatment or therapeutic hypothermia could attenuate post-resuscitation organ dysfunction in swine model [33,44–47]. Here, we found the activities of Ca<sup>2+</sup>-ATPase and Na<sup>+</sup>-K<sup>+</sup>-ATPase in brain tissues in CA swine model were elevated by ECMO compared with CCPR.

Several limitations also exist in our study. We used the thermodilution method to measure CO, which might results in a slight but significant overestimation of CO [48,49] and might affect the examination of CO. However, we thought that this should not affect comparison of CO between ECMO group and CCPR group. And we have used large dose of heparin (5000 IU) to pre-coat circuit and membrane oxygenator during application of ECMO. The heparin, which was not used during CCPR, might also improve microcirculation and brain function in addition to ECMO [50]. We will clarify the effects of heparin on neurological outcomes during ECMO in future.

In summary, we preliminarily revealed the potential molecular mechanisms that ECMO improved neurological outcomes in CA animal model compared with CCPR partly via attenuating inflammation and increasing Ca<sup>2+</sup>-ATPase and Na<sup>+</sup>-K<sup>+</sup>-ATPase activities.

### Author Contribution

Designed the study: Z.Y. and L.C. Performed the experiments: Z.Y., Y.X., L.J., Z.Q. and Z.L. Data collection and Statistical analyses: Z.Y., Y.X., L.Y. and L.B. Wrote the main manuscript text: Z.Y., L.C., and Y.X. L.Y. All authors reviewed and approved the manuscript.



## Funding

The authors declare that there are no sources of funding to be acknowledged.

## Competing Interests

The authors declare that there are no competing interests associated with the manuscript.

## Abbreviations

BBB, blood–brain barrier; CA, cardiac arrest; CCPR, conventional cardiopulmonary resuscitation; CO, cardiac output; CPR, cardiopulmonary resuscitation; ECG, electrocardiogram; ECMO, extracorporeal membrane oxygenation; ELISA, enzyme-linked immunosorbent assay; HR, heart rate; IHCA, in of hospital CA; MAP, mean arterial pressure; OHCA, out of hospital CA; ROSC, return of spontaneous circulation; TEM, transmission electron microscope.

## References

- Zheng, Z.J., Croft, J.B., Giles, W.H. and Mensah, G.A. (2001) Sudden cardiac death in the United States, 1989 to 1998. *Circulation* **104**, 2158–2163, <https://doi.org/10.1161/hc4301.098254>
- Fox, C.S., Evans, J.C., Larson, M.G., Kannel, W.B. and Levy, D. (2004) Temporal trends in coronary heart disease mortality and sudden cardiac death from 1950 to 1999: the Framingham Heart Study. *Circulation* **110**, 522–527, <https://doi.org/10.1161/01.CIR.0000136993.34344.41>
- Girotra, S., van Diepen, S., Nallamothu, B.K., Carrel, M., Vellano, K., Anderson, M.L. et al. (2016) Regional variation in out-of-hospital cardiac arrest survival in the United States. *Circulation* **133**, 2159–2168, <https://doi.org/10.1161/CIRCULATIONAHA.115.018175>
- Girotra, S., Nallamothu, B.K., Spertus, J.A., Li, Y., Krumholz, H.M., Chan, P.S. et al. (2012) Trends in survival after in-hospital cardiac arrest. *N. Engl. J. Med.* **367**, 1912–1920, <https://doi.org/10.1056/NEJMoa1109148>
- Goldberger, Z.D., Chan, P.S., Berg, R.A., Kronick, S.L., Cooke, C.R., Lu, M. et al. (2012) Duration of resuscitation efforts and survival after in-hospital cardiac arrest: an observational study. *Lancet* **380**, 1473–1481, [https://doi.org/10.1016/S0140-6736\(12\)60862-9](https://doi.org/10.1016/S0140-6736(12)60862-9)
- Stretch, R., Sauer, C.M., Yuh, D.D. and Bonde, P. (2014) National trends in the utilization of short-term mechanical circulatory support: incidence, outcomes, and cost analysis. *J. Am. Coll. Cardiol.* **64**, 1407–1415, <https://doi.org/10.1016/j.jacc.2014.07.958>
- Karagiannidis, C., Brodie, D., Strassmann, S., Stoelben, E., Philipp, A., Bein, T. et al. (2016) Extracorporeal membrane oxygenation: evolving epidemiology and mortality. *Intensive Care Med.* **42**, 889–896, <https://doi.org/10.1007/s00134-016-4273-z>
- Ha, T.S., Yang, J.H., Cho, Y.H., Chung, C.R., Park, C.M., Jeon, K. et al. (2017) Clinical outcomes after rescue extracorporeal cardiopulmonary resuscitation for out-of-hospital cardiac arrest. *Emerg. Med. J.* **34**, 107–111, <https://doi.org/10.1136/emered-2015-204817>
- Maekawa, K., Tanno, K., Hase, M., Mori, K. and Asai, Y. (2013) Extracorporeal cardiopulmonary resuscitation for patients with out-of-hospital cardiac arrest of cardiac origin: a propensity-matched study and predictor analysis. *Crit. Care Med.* **41**, 1186–1196, <https://doi.org/10.1097/CCM.0b013e31827ca4c8>
- Chen, Y.S., Lin, J.W., Yu, H.Y., Ko, W.J., Jerng, J.S., Chang, W.T. et al. (2008) Cardiopulmonary resuscitation with assisted extracorporeal life-support versus conventional cardiopulmonary resuscitation in adults with in-hospital cardiac arrest: an observational study and propensity analysis. *Lancet* **372**, 554–561, [https://doi.org/10.1016/S0140-6736\(08\)60958-7](https://doi.org/10.1016/S0140-6736(08)60958-7)
- Kim, S.J., Kim, H.J., Lee, H.Y., Ahn, H.S. and Lee, S.W. (2016) Comparing extracorporeal cardiopulmonary resuscitation with conventional cardiopulmonary resuscitation: a meta-analysis. *Resuscitation* **103**, 106–116, <https://doi.org/10.1016/j.resuscitation.2016.01.019>
- Blumenstein, J., Leick, J., Liebetrau, C., Kempfert, J., Gaede, L., Gross, S. et al. (2016) Extracorporeal life support in cardiovascular patients with observed refractory in-hospital cardiac arrest is associated with favourable short and long-term outcomes: A propensity-matched analysis. *Eur. Heart J. Acute Cardiovasc. Care* **5**, 13–22, <https://doi.org/10.1177/2048872615612454>
- Massetti, M., Gaudino, M., De Paulis, S., Scapigliati, A. and Cavaliere, F. (2014) Extracorporeal membrane oxygenation for resuscitation and cardiac arrest management. *Heart Fail. Clin.* **10**, S85–S93, <https://doi.org/10.1016/j.hfc.2013.08.005>
- Shin, T.G., Choi, J.H., Jo, I.J., Sim, M.S., Song, H.G., Jeong, Y.K. et al. (2011) Extracorporeal cardiopulmonary resuscitation in patients with in-hospital cardiac arrest: a comparison with conventional cardiopulmonary resuscitation. *Crit. Care Med.* **39**, 1–7, <https://doi.org/10.1097/CCM.0b013e3181feb339>
- Reynolds, J.C., Frisch, A., Rittenberger, J.C. and Callaway, C.W. (2013) Duration of resuscitation efforts and functional outcome after out-of-hospital cardiac arrest: when should we change to novel therapies? *Circulation* **128**, 2488–2494, <https://doi.org/10.1161/CIRCULATIONAHA.113.002408>
- Sasson, C., Rogers, M.A., Dahl, J. and Kellermann, A.L. (2010) Predictors of survival from out-of-hospital cardiac arrest: a systematic review and meta-analysis. *Circ. Cardiovasc. Qual. Outcomes* **3**, 63–81, <https://doi.org/10.1161/CIRCOUTCOMES.109.889576>
- Meaney, P.A., Nadkarni, V.M., Kern, K.B., Indik, J.H., Halperin, H.R. and Berg, R.A. (2010) Rhythms and outcomes of adult in-hospital cardiac arrest. *Crit. Care Med.* **38**, 101–108, <https://doi.org/10.1097/CCM.0b013e3181b43282>
- Ouweneel, D.M., Schotborgh, J.V., Limpens, J., Sjaauw, K.D., Engstrom, A.E., Lagrand, W.K. et al. (2016) Extracorporeal life support during cardiac arrest and cardiogenic shock: a systematic review and meta-analysis. *Intensive Care Med.* **42**, 1922–1934, <https://doi.org/10.1007/s00134-016-4536-8>
- Mc, I.R.B., Timpa, J.G., Kurundkar, A.R., Holt, D.W., Kelly, D.R., Hartman, Y.E. et al. (2010) Plasma concentrations of inflammatory cytokines rise rapidly during ECMO-related SIRS due to the release of preformed stores in the intestine. *Lab. Invest.* **90**, 128–139, <https://doi.org/10.1038/labinvest.2009.119>
- Stolp, H.B. and Dziegielewska, K.M. (2009) Review: role of developmental inflammation and blood-brain barrier dysfunction in neurodevelopmental and neurodegenerative diseases. *Neuropathol. Appl. Neurobiol.* **35**, 132–146, <https://doi.org/10.1111/j.1365-2990.2008.01005.x>

- 21 Jiang, W., Desjardins, P. and Butterworth, R.F. (2009) Cerebral inflammation contributes to encephalopathy and brain edema in acute liver failure: protective effect of minocycline. *J. Neurochem.* **109**, 485–493, <https://doi.org/10.1111/j.1471-4159.2009.05981.x>
- 22 Denes, A., Thornton, P., Rothwell, N.J. and Allan, S.M. (2010) Inflammation and brain injury: acute cerebral ischaemia, peripheral and central inflammation. *Brain Behav. Immun.* **24**, 708–723, <https://doi.org/10.1016/j.bbi.2009.09.010>
- 23 Aktas, O., Ullrich, O., Infante-Duarte, C., Nitsch, R. and Zipp, F. (2007) Neuronal damage in brain inflammation. *Arch. Neurol.* **64**, 185–189, <https://doi.org/10.1001/archneur.64.2.185>
- 24 Yang, M.S., Min, K.J. and Joe, E. (2007) Multiple mechanisms that prevent excessive brain inflammation. *J. Neurosci. Res.* **85**, 2298–2305, <https://doi.org/10.1002/jnr.21254>
- 25 Dunn, A.J. (2006) Effects of cytokines and infections on brain neurochemistry. *Clin. Neurosci. Res.* **6**, 52–68, <https://doi.org/10.1016/j.cnr.2006.04.002>
- 26 Londono, D., Carvajal, J., Strle, K., Kim, K.S. and Cadavid, D. (2011) IL-10 prevents apoptosis of brain endothelium during bacteremia. *J. Immunol.* **186**, 7176–7186, <https://doi.org/10.4049/jimmunol.1100060>
- 27 Neumar, R.W., Nolan, J.P., Adrie, C., Aibiki, M., Berg, R.A., Bottiger, B.W. et al. (2008) Post-cardiac arrest syndrome: epidemiology, pathophysiology, treatment, and prognostication. A consensus statement from the International Liaison Committee on Resuscitation (American Heart Association, Australian and New Zealand Council on Resuscitation, European Resuscitation Council, Heart and Stroke Foundation of Canada, InterAmerican Heart Foundation, Resuscitation Council of Asia, and the Resuscitation Council of Southern Africa); the American Heart Association Emergency Cardiovascular Care Committee; the Council on Cardiovascular Surgery and Anesthesia; the Council on Cardiopulmonary, Perioperative, and Critical Care; the Council on Clinical Cardiology; and the Stroke Council. *Circulation* **118**, 2452–2483
- 28 Laver, S., Farrow, C., Turner, D. and Nolan, J. (2004) Mode of death after admission to an intensive care unit following cardiac arrest. *Intensive Care Med.* **30**, 2126–2128, <https://doi.org/10.1007/s00134-004-2425-z>
- 29 Geppert, A., Zorn, G., Karth, G.D., Haumer, M., Gwechenberger, M., Koller-Strametz, J. et al. (2000) Soluble selectins and the systemic inflammatory response syndrome after successful cardiopulmonary resuscitation. *Crit. Care Med.* **28**, 2360–2365, <https://doi.org/10.1097/00003246-200007000-00030>
- 30 Bro-Jeppesen, J., Kjaergaard, J., Wanscher, M., Nielsen, N., Friberg, H., Bjerre, M. et al. (2015) Systemic inflammatory response and potential prognostic implications after out-of-hospital cardiac arrest: a substudy of the target temperature management trial. *Crit. Care Med.* **43**, 1223–1232, <https://doi.org/10.1097/CCM.0000000000000937>
- 31 Niemann, J.T., Rosborough, J.P., Youngquist, S., Shah, A.P., Lewis, R.J., Phan, Q.T. et al. (2009) Cardiac function and the proinflammatory cytokine response after recovery from cardiac arrest in swine. *J. Interferon Cytokine Res.* **29**, 749–758, <https://doi.org/10.1089/jir.2009.0035>
- 32 Shi, X., Li, M., Huang, K., Zhou, S., Hu, Y., Pan, S. et al. (2017) HMGB1 binding heptamer peptide improves survival and ameliorates brain injury in rats after cardiac arrest and cardiopulmonary resuscitation. *Neuroscience* **360**, 128–138, <https://doi.org/10.1016/j.neuroscience.2017.07.052>
- 33 Zhao, H., Li, C.S., Gong, P., Tang, Z.R., Hua, R., Mei, X. et al. (2012) Molecular mechanisms of therapeutic hypothermia on neurological function in a swine model of cardiopulmonary resuscitation. *Resuscitation* **83**, 913–920, <https://doi.org/10.1016/j.resuscitation.2012.01.001>
- 34 Wu, M.Y. and Hill, C.S. (2009) Tgf-beta superfamily signaling in embryonic development and homeostasis. *Dev. Cell* **16**, 329–343, <https://doi.org/10.1016/j.devcel.2009.02.012>
- 35 Vogel, T., Ahrens, S., Buttner, N. and Kriegelstein, K. (2010) Transforming growth factor beta promotes neuronal cell fate of mouse cortical and hippocampal progenitors in vitro and in vivo: identification of Nedd9 as an essential signaling component. *Cereb. Cortex* **20**, 661–671, <https://doi.org/10.1093/cercor/bhp134>
- 36 Logan, T.T., Villapol, S. and Symes, A.J. (2013) TGF-beta superfamily gene expression and induction of the Runx1 transcription factor in adult neurogenic regions after brain injury. *PLoS ONE* **8**, e59250, <https://doi.org/10.1371/journal.pone.0059250>
- 37 Luo, J., Lin, A.H., Masliah, E. and Wyss-Coray, T. (2006) Bioluminescence imaging of Smad signaling in living mice shows correlation with excitotoxic neurodegeneration. *Proc. Natl. Acad. Sci. U.S.A.* **103**, 18326–18331, <https://doi.org/10.1073/pnas.0605077103>
- 38 Town, T., Laouar, Y., Pittenger, C., Mori, T., Szekely, C.A., Tan, J. et al. (2008) Blocking TGF-beta-Smad2/3 innate immune signaling mitigates Alzheimer-like pathology. *Nat. Med.* **14**, 681–687, <https://doi.org/10.1038/nm1781>
- 39 Lanz, T.V., Ding, Z., Ho, P.P., Luo, J., Agrawal, A.N., Srinagesh, H. et al. (2010) Angiotensin II sustains brain inflammation in mice via TGF-beta. *J. Clin. Invest.* **120**, 2782–2794, <https://doi.org/10.1172/JCI41709>
- 40 Manaenko, A., Lekic, T., Barnhart, M., Hartman, R. and Zhang, J.H. (2014) Inhibition of transforming growth factor-beta attenuates brain injury and neurological deficits in a rat model of germinal matrix hemorrhage. *Stroke* **45**, 828–834, <https://doi.org/10.1161/STROKEAHA.113.003754>
- 41 Rustenhoven, J., Aalderink, M., Scotter, E.L., Oldfield, R.L., Bergin, P.S., Mee, E.W. et al. (2016) TGF-beta1 regulates human brain pericyte inflammatory processes involved in neurovasculature function. *J. Neuroinflammation* **13**, 37, <https://doi.org/10.1186/s12974-016-0503-0>
- 42 Saghazadeh, A., Ferrari, C.C. and Rezaei, N. (2016) Deciphering variability in the role of interleukin-1beta in Parkinson's disease. *Rev. Neurosci.* **27**, 635–650, <https://doi.org/10.1515/revneuro-2015-0059>
- 43 Patel, R.K., Prasad, N., Kuwar, R., Haldar, D. and Abdul-Muneer, P.M. (2017) Transforming growth factor-beta 1 signaling regulates neuroinflammation and apoptosis in mild traumatic brain injury. *Brain Behav. Immun.* **64**, 244–258, <https://doi.org/10.1016/j.bbi.2017.04.012>
- 44 Han, Y., Song, Z.J., Tong, C.Y. and Li, C.S. (2013) Effects of hypothermia on the liver in a swine model of cardiopulmonary resuscitation. *World J. Emerg. Med.* **4**, 298–303, <https://doi.org/10.5847/wjem.j.issn.1920-8642.2013.04.011>
- 45 Ji, X.F., Yang, L., Zhang, M.Y., Li, C.S., Wang, S. and Cong, L.H. (2011) Shen-fu injection attenuates postresuscitation myocardial dysfunction in a porcine model of cardiac arrest. *Shock* **35**, 530–536, <https://doi.org/10.1097/SHK.0b013e31820e2058>
- 46 Lu, Y., Li, C.S. and Wang, S. (2012) Effect of hypertransfusion on the gastrointestinal tract after cardiac arrest in a porcine model. *World J. Emerg. Med.* **3**, 49–54, <https://doi.org/10.5847/wjem.j.issn.1920-8642.2012.01.009>

- 47 Zhang, M.Y., Ji, X.F., Wang, S. and Li, C.S. (2012) Shen-fu injection attenuates postresuscitation lung injury in a porcine model of cardiac arrest. *Resuscitation* **83**, 1152–1158, <https://doi.org/10.1016/j.resuscitation.2012.01.041>
- 48 Monnet, X. and Teboul, J.L. (2017) Transpulmonary thermodilution: advantages and limits. *Crit. Care* **21**, 147, <https://doi.org/10.1186/s13054-017-1739-5>
- 49 Huber, W., Kraski, T., Haller, B., Mair, S., Saugel, B., Beitz, A. et al. (2014) Room-temperature vs iced saline indicator injection for transpulmonary thermodilution. *J. Crit. Care* **29**, 1133, e7-.e14, <https://doi.org/10.1016/j.jcrc.2014.08.005>
- 50 Ichinose, K., Okamoto, T., Tashiro, M., Tanimoto, H. and Terasaki, H. (2006) The effects of pre-arrest heparin administration dose for cardiac arrest model using extracorporeal lung and a heart assist (ECLHA) in dogs. *Resuscitation* **69**, 311–318, <https://doi.org/10.1016/j.resuscitation.2005.07.027>
